# Supplementary material for: An Immune System-Modified Rat Model for Human Stem Cell Transplantation Research
Source: PubMed Central journal article supplement — Stem Cell Reports. 2018 Jul 5;11(2):514–21. doi: 10.1016/j.stemcr.2018.06.004 (PMC6092637; doi:10.1016/j.stemcr.2018.06.004), 2018-07-05
Supplement: mmc1.pdf [file mmc1.pdf]

**Stem Cell Reports, Volume 11**

**Supplemental Information**

**An Immune System-Modified Rat Model for Human Stem Cell  
Transplantation Research**

**Xinglong Yang, Jianlong Zhou, Jingjin He, Jingfeng Liu, Hui Wang, Yachen Liu, Tao  
Jiang, Qianbing Zhang, Xuemei Fu, and Yang Xu**

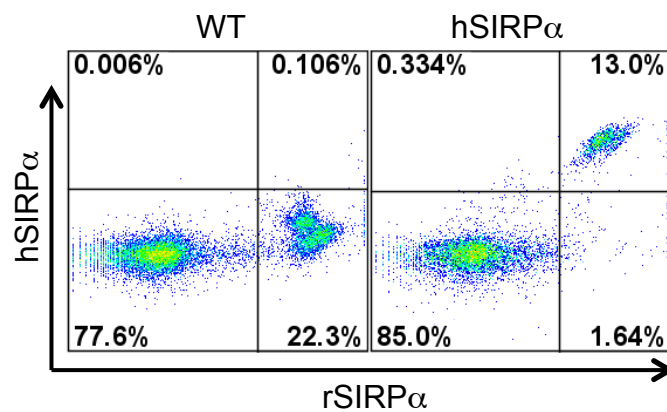

**Figure S1. Characterization of *hSIRPα*<sup>+</sup> transgenic rats.** Related to Figure 1. *hSIRPα* and *rSIRPα* were co-expressed on the leukocytes of *hSIRPα*<sup>+</sup> transgenic rats.

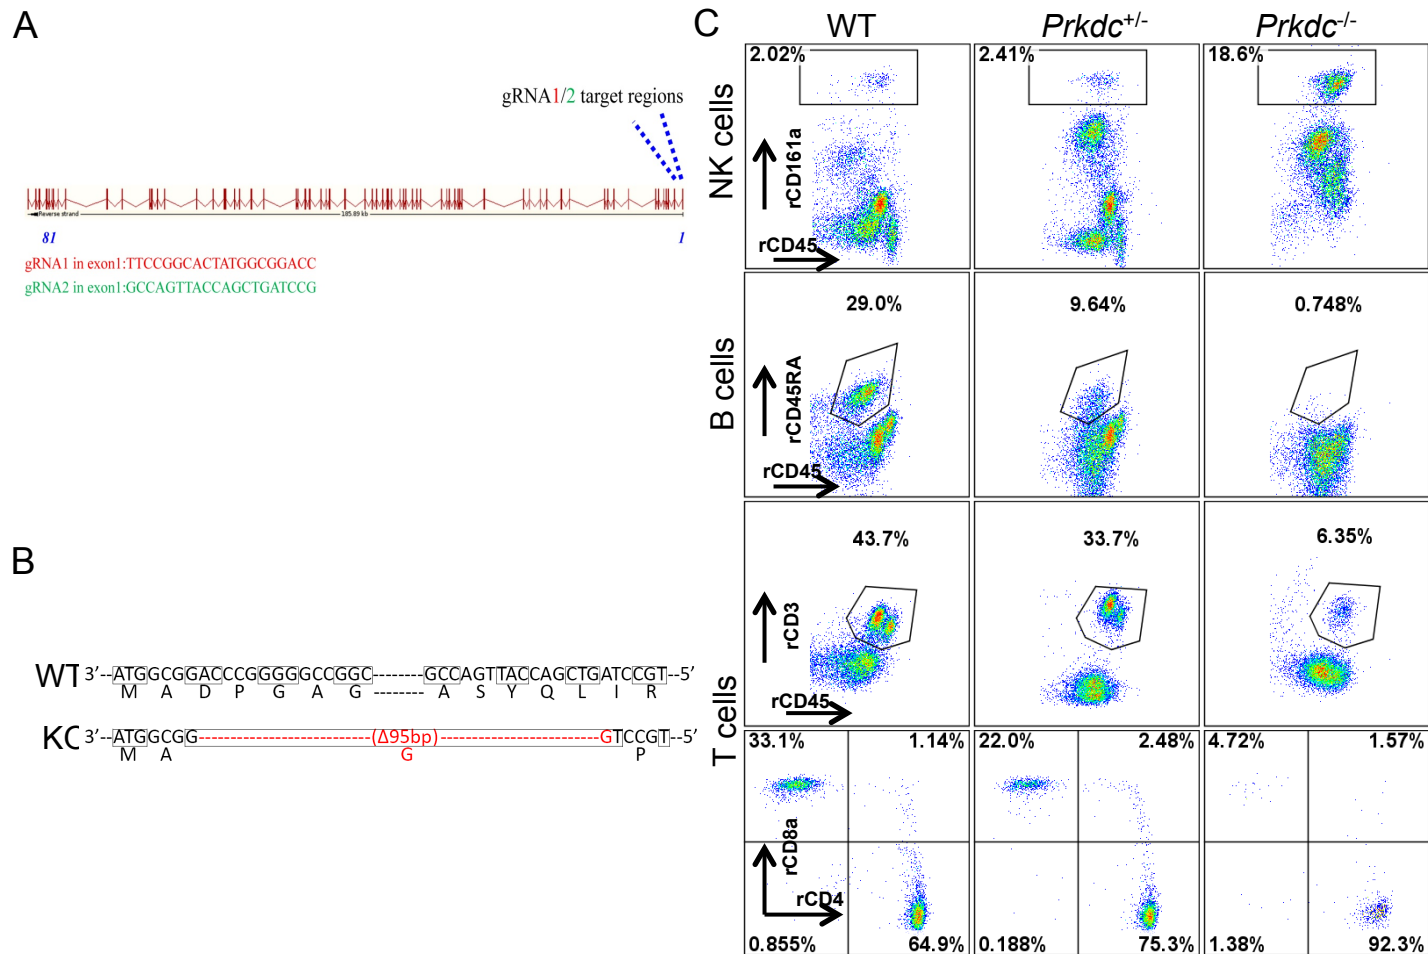

**Figure S2. Generation and characterization of *Prkdc*<sup>-/-</sup> rats.** Related Figure 1. (A) The genomic locus of the rat *Prkdc* gene and the locations of gRNA are indicated. (B) The sequence of the disrupted *Prkdc* gene is shown. (C) The development of B cells and T cells are defective in *Prkdc*<sup>-/-</sup> rats. PBMCs of WT, *Prkdc*<sup>+/-</sup>, and *Prkdc*<sup>-/-</sup> rats were analyzed by flow cytometry for B cells, T cells and NK cells.

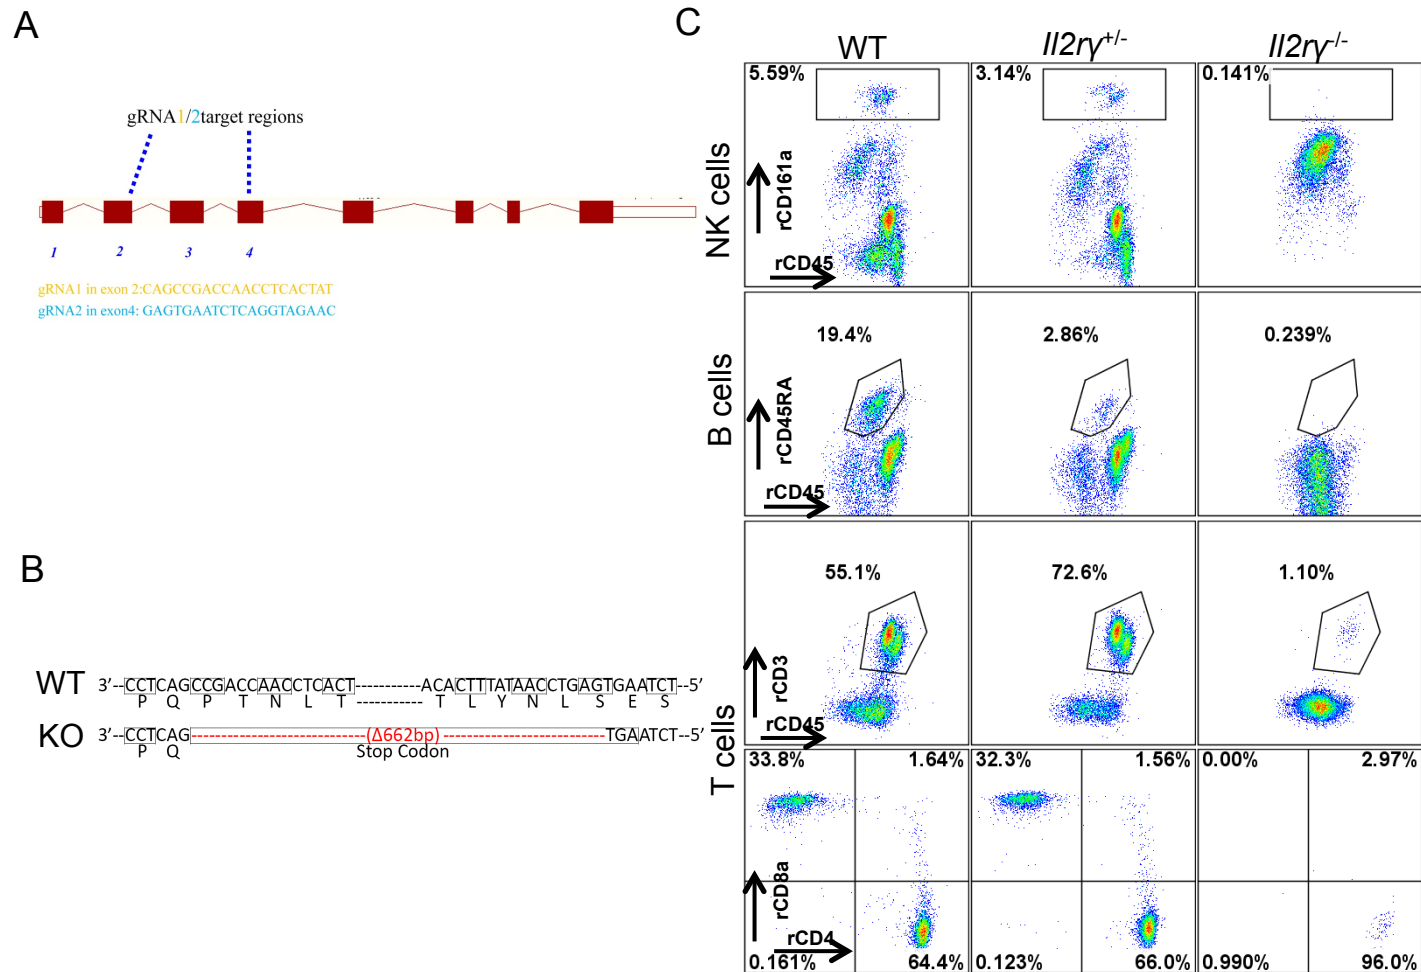

**Figure S3. Generation and characterization of *Il2ry*<sup>-/-</sup> Rats.** Related to Figure 1. (A) The genomic locus of rat *Il2ry* gene and locations of gRNA are indicated. (B) The sequence of the disrupted *Il2ry* gene is shown. (C) The development of NK cells, B cells and T cells are defective in *Il2ry*<sup>-/-</sup> rats. PBMCs of WT, *Il2ry*<sup>+/-</sup>, and *Il2ry*<sup>-/-</sup> rats were analyzed by flow cytometry for B cells, T cells and NK cells.

| Cell origin        | PBMC       |          |           | Spleen     |          |           | Bone Marrow |          |           |
|--------------------|------------|----------|-----------|------------|----------|-----------|-------------|----------|-----------|
| Surface marker (%) | CD45/Total | CD3/CD45 | CD19/CD45 | CD45/Total | CD3/CD45 | CD19/CD45 | CD45/Total  | CD3/CD45 | CD19/CD45 |
| Rat#1              | 6.00       | 95.50    | 0.00      | 2.70       | 98.10    | 1.30      | 4.30        | 86.30    | 0.80      |
| Rat#2              | 7.89       | 2.49     | 11.10     | 17.40      | 10.40    | 24.30     | 24.40       | 1.54     | 46.90     |
| Rat#3              | 62.60      | 92.90    | 0.20      | 58.60      | 90.20    | 0.60      | 71.60       | 94.70    | 0.40      |
| Rat#4              | 0.05       | 0.00     | 0.00      | 4.79       | 47.40    | 48.70     | 0.94        | 27.60    | 47.10     |
| Rat#5              | 0.60       | 11.10    | 0.00      | 4.10       | 31.10    | 5.70      | 16.40       | 3.20     | 13.00     |
| Rat#6              | 25.30      | 30.10    | 2.58      | N/A        | N/A      | N/A       | 43.80       | 66.10    | 8.11      |

**Figure S4. The percentage of immune cells in NSGL rats reconstituted with human CD34<sup>+</sup> fetal liver cells and fetal thymus.** Related to Figure 4. The spleen sample of reconstituted Rat #6 was lost during processing.
